# Supplementary material for: KOH activated carbon/graphene nanosheets composites as high performance electrode materials in supercapacitors
Source: Royal Society of Chemistry journal article supplement (doi:10.1039/c4ra06710j), 2014-09-11
Supplement: c4ra06710j1.pdf [file c4ra06710j1.pdf]

## Supplementary materials

# KOH activated carbon/graphene nanosheets composites as high performance electrode materials in supercapacitor

Shengming Yu<sup>a</sup>, Yueming Li<sup>a\*</sup>, Ning Pan<sup>b\*</sup>

<sup>a</sup> State Key Laboratory of Metastable Materials Science and Technology, College of Materials Science and Engineering, Yanshan University, Qinhuangdao, Hebei Province, 066004, China.

<sup>b</sup> Nanomaterials in the Environment, Agriculture, and Technology (NEAT) University of California at Davis, CA, 95616

---

\* Corresponding author: Dr. Yueming Li, Tel.: +86 3358 074631. Fax: +86 3358 074545. E-mail: liyueming@ysu.edu.cn; and Prof. Ning Pan Tel: 1-530-752-6232; Fax: 1-530-752-7584; Email: npan@ucdavis.edu

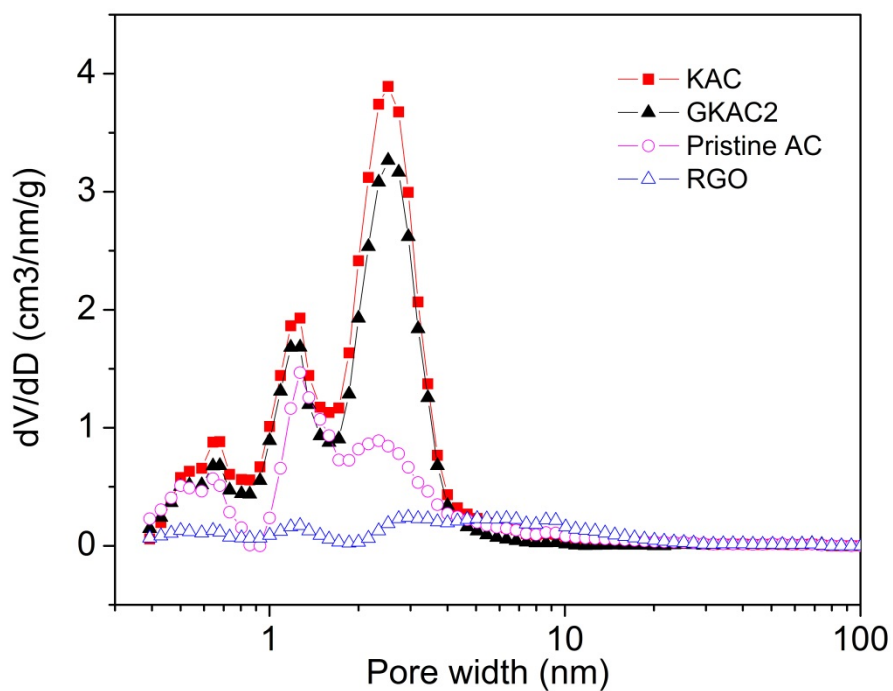

**Fig. S1** Pore size distribution of KAC, pristine AC, RGO and GKAC2 using NLDFT calculation assuming slit geometry.

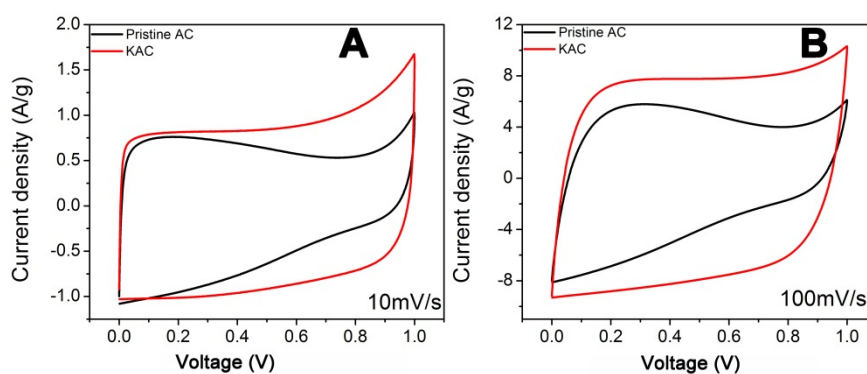

**Fig. S2** CV curve of pristine AC and KAC electrode at various scan rates of  $10\text{mV s}^{-1}$  and  $100\text{mV s}^{-1}$  in 6M KOH aqueous solution.

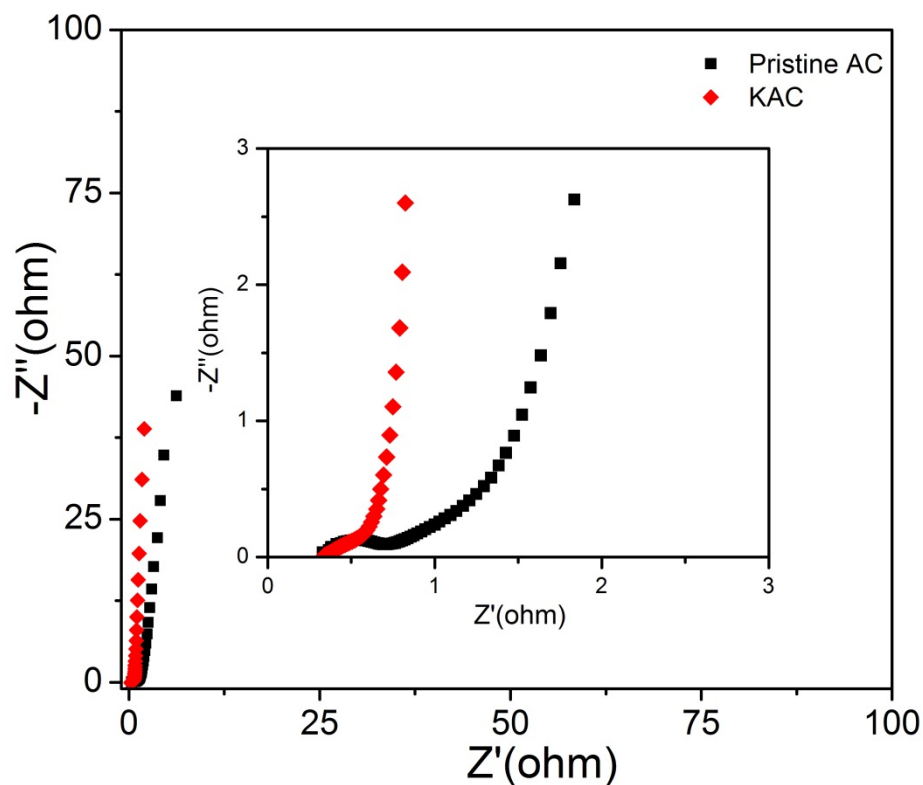

**Fig. S3** Nyquist plots of pristine AC and KAC electrodes (inset: magnified part at high frequency) in 6M KOH aqueous solution.

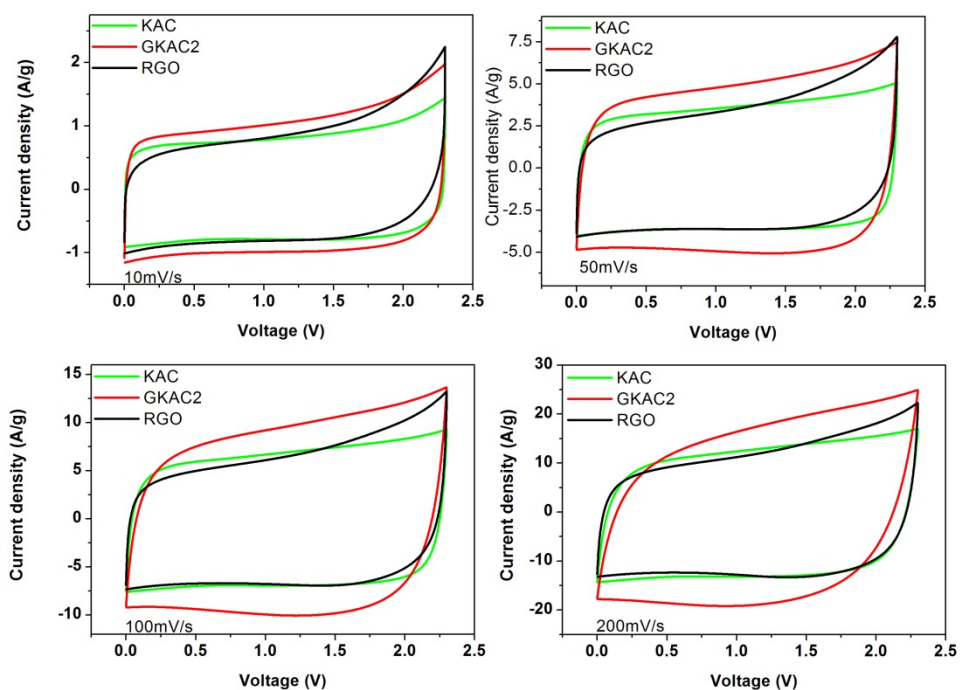

**Fig. S4** Cyclic voltammetry curves of RGO, GaAC2, and KAC electrodes at various scan rates in 1M TEABF<sub>4</sub> in AN solution.

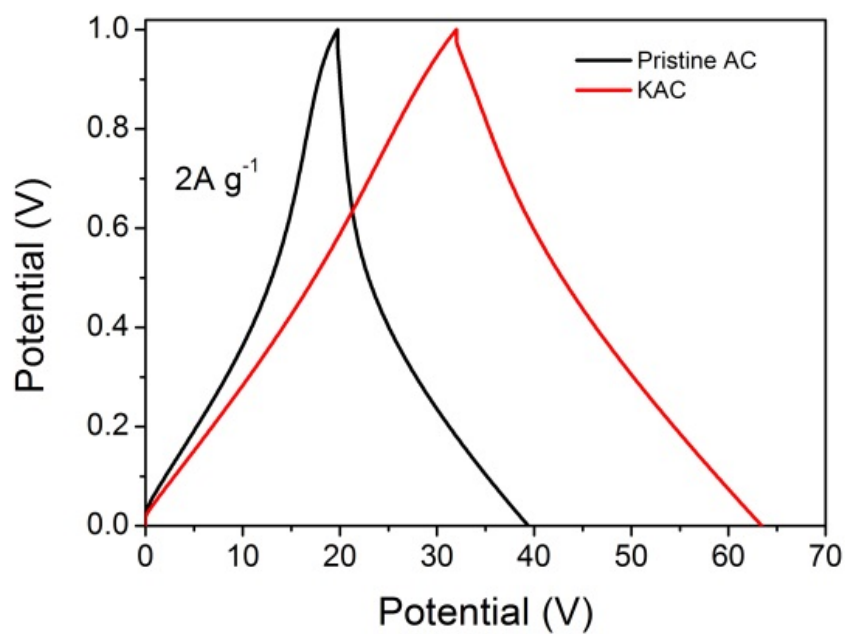

**Fig. S5** Charge-discharge curves of pristine AC and KAC electrodes at current density of  $2 \text{ A g}^{-1}$  in 6M KOH aqueous solution.

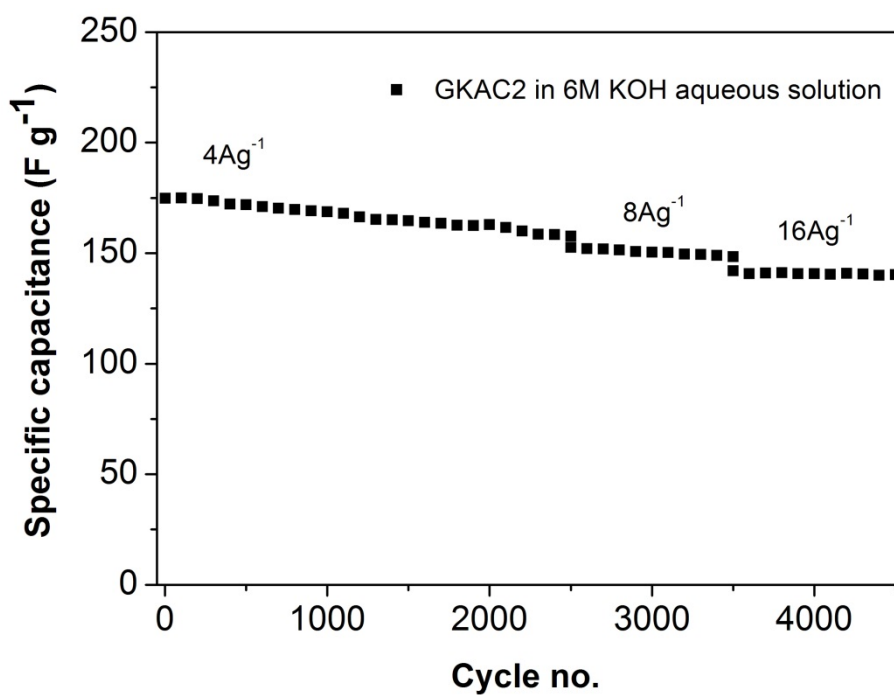

**Fig. S6** Cycle life of GKAC2 at varied current density in 6M KOH aqueous solution.

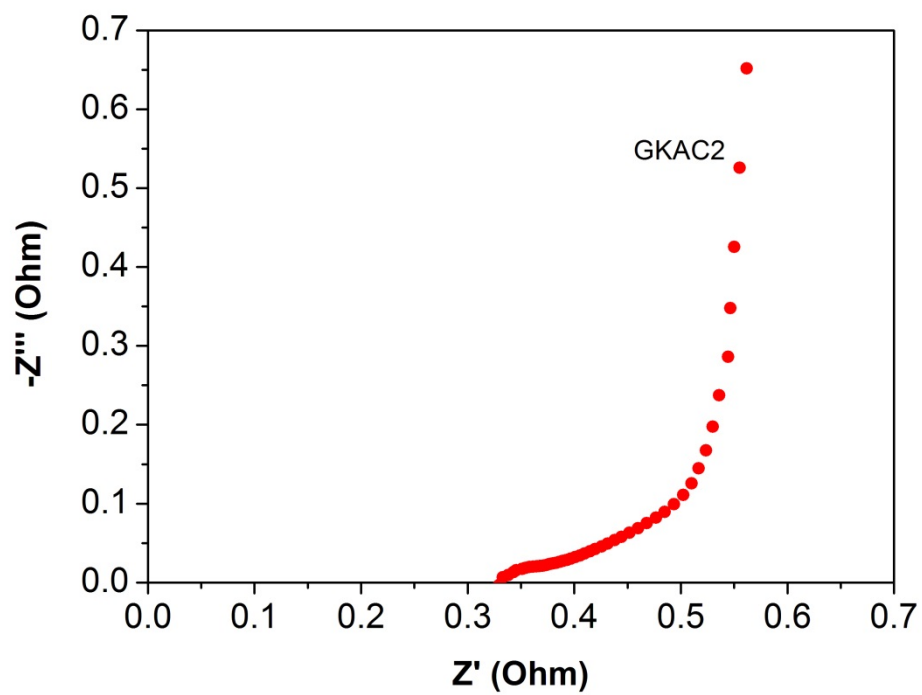

**Fig. S7** Nyquist plots of GKAC2 electrodes at high frequency in 6M KOH aqueous solution.
